# Supplementary material for: Creation of an unexpected plane of enhanced covalency in cerium(III) and berkelium(III) terpyridyl complexes
Source: PubMed Central journal article supplement (PMC8664847; doi:10.1038/s41467-021-27576-y), 2021-12-10
Supplement: 41467_2021_27576_MOESM3_ESM.pdf [file 41467_2021_27576_MOESM3_ESM.pdf]

## **Description of Additional Supplementary Files**

**Supplementary Data 1:** Atomic coordinates used for electronic structure calculations
