# Supplementary material for: Creation of an unexpected plane of enhanced covalency in cerium(III) and berkelium(III) terpyridyl complexes
Source: PubMed Central journal article supplement (PMC8664847; doi:10.1038/s41467-021-27576-y), 2021-12-10
Supplement: 41467_2021_27576_MOESM4_ESM.pdf [file 41467_2021_27576_MOESM4_ESM.pdf]

## Coordinates of Ce1

|    |              |              |              |
|----|--------------|--------------|--------------|
| Ce | 0.000000000  | 0.000000000  | 0.000000000  |
| N  | 0.000000000  | 0.000000000  | 3.030333437  |
| N  | 2.560722877  | 0.000000000  | 0.642516813  |
| N  | 0.566414240  | -0.513583904 | -2.913832028 |
| N  | 1.272177498  | 2.293522842  | -0.165600924 |
| N  | -2.504353207 | 1.609466250  | -0.500814867 |
| N  | 9.629509574  | 0.499874445  | 5.341719758  |
| N  | 1.238417863  | -2.310060039 | 0.202347797  |
| O  | -2.001054006 | -1.481514043 | -0.077088700 |
| O  | -3.619881290 | 2.078840691  | -0.734485792 |
| O  | 0.297729509  | 1.054338911  | 2.370061542  |
| O  | -2.101248061 | 1.394011352  | 0.682718964  |
| O  | -1.707089901 | 1.315435944  | -1.453086017 |
| O  | 10.659851006 | 0.967678812  | 4.849616259  |
| O  | 0.696047452  | -0.564985414 | -4.124954426 |
| H  | -2.393534723 | -1.473477704 | 0.683050346  |
| O  | 0.051626654  | -0.036415084 | 4.250990825  |
| O  | -0.343737819 | -1.165446019 | -2.300080724 |
| O  | 9.542428701  | 0.110583202  | 6.507804726  |
| O  | 1.343274335  | 0.196464531  | -2.178827817 |
| O  | -0.350828360 | -1.023598020 | 2.341784606  |
| C  | 2.555589096  | 2.401000593  | 0.265464995  |
| C  | 4.357581808  | 1.276358993  | 1.605570368  |
| H  | 4.740701199  | 2.125904371  | 1.791986193  |
| C  | 0.557177674  | -3.436359281 | -0.064676879 |
| H  | -0.319269139 | -3.364079178 | -0.425242435 |
| C  | 1.433140395  | 4.535941307  | -1.036535319 |
| H  | 1.023144684  | 5.256335522  | -1.501027491 |
| C  | 2.736595285  | 4.639255603  | -0.579478261 |
| H  | 3.232811088  | 5.438363669  | -0.712601228 |
| C  | 3.173533865  | 1.186847518  | 0.878000567  |
| C  | 1.078855677  | -4.701545845 | 0.163339141  |
| H  | 0.562477881  | -5.478597242 | -0.016211038 |
| C  | 0.735907750  | 3.351362948  | -0.799703623 |
| H  | -0.162957573 | 3.289339612  | -1.100672930 |
| C  | 7.212070952  | 1.111254464  | 2.578629013  |
| H  | 7.115600659  | 1.682535013  | 1.825729942  |
| C  | 2.484970418  | -2.409590209 | 0.718196060  |
| C  | 3.086170442  | -3.651733379 | 0.936640868  |
| H  | 3.973666714  | -3.705940100 | 1.271385748  |
| C  | 8.351871745  | 1.192475562  | 3.370187079  |
| H  | 9.058850650  | 1.784978431  | 3.143142882  |
| C  | 4.393175624  | -1.107656238 | 1.733780527  |
| H  | 4.817404224  | -1.921228359 | 1.980168020  |
| C  | 8.435319399  | 0.391338403  | 4.496440998  |
| C  | 2.363544994  | -4.807857263 | 0.656609502  |
| H  | 2.751055953  | -5.662996405 | 0.803234209  |
| C  | 4.975047571  | 0.116714858  | 2.057980524  |
| C  | 3.306640067  | 3.558045886  | 0.075250328  |
| H  | 4.201344294  | 3.605989419  | 0.390989199  |
| C  | 3.176857733  | -1.125614382 | 1.041078623  |
| C  | 6.202890472  | 0.185772536  | 2.890516891  |

|   |              |              |              |
|---|--------------|--------------|--------------|
| C | 6.339043916  | -0.643101988 | 4.011911111  |
| H | 5.672491364  | -1.291861098 | 4.204631316  |
| C | 7.442685662  | -0.519084992 | 4.842088015  |
| H | 7.519147864  | -1.044686125 | 5.629855823  |
| H | -2.433144370 | -1.635583454 | -0.766745993 |

Coordinates of Bk1

|    |              |              |              |
|----|--------------|--------------|--------------|
| Bk | 0.000000000  | 0.000000000  | 0.000000000  |
| O  | -2.050072970 | -1.340260549 | -0.710150730 |
| O  | -3.558907011 | -2.073647531 | 0.695983157  |
| O  | 9.354842071  | 0.064748906  | -6.608796220 |
| O  | 1.339893411  | -0.187688401 | 2.095240249  |
| O  | -1.664729913 | -1.265069769 | 1.419050876  |
| O  | -0.349108751 | 1.115685720  | 2.273206293  |
| O  | 10.462821319 | -0.893156378 | -5.010515788 |
| O  | 0.759151935  | 0.521904205  | 4.058449281  |
| O  | -0.315224569 | 1.024689750  | -2.264909630 |
| O  | 0.265772479  | -1.063679307 | -2.351266891 |
| O  | -1.946856842 | 1.417885400  | 0.086722801  |
| O  | 0.051781269  | 0.075026745  | -4.202518332 |
| N  | 1.133323219  | 2.279728641  | -0.152950916 |
| N  | 1.161962821  | -2.258514063 | 0.142262705  |
| N  | 2.434920712  | 0.000000000  | -0.686264314 |
| N  | 9.434372268  | -0.391203902 | -5.476144220 |
| N  | -2.452509463 | -1.572909034 | 0.461226916  |
| N  | 0.610727818  | 0.464193478  | 2.824561673  |
| N  | 0.000000000  | 0.000000000  | -2.982692964 |
| H  | 3.047209212  | -5.471074803 | 0.492934846  |
| H  | 4.601482116  | -2.094980698 | -1.887617031 |
| H  | 3.809388268  | 3.712736102  | -1.298687527 |
| H  | 4.006088288  | -3.644418033 | -0.612915183 |
| H  | 4.669770180  | 1.942769202  | -2.007326545 |
| H  | -0.252600431 | -3.236452442 | 1.121922831  |
| H  | 6.930903199  | -1.701345237 | -2.006234853 |
| H  | 0.880262091  | -5.258065640 | 1.385438072  |
| H  | 7.366135601  | 1.200737172  | -5.665023482 |
| H  | 2.596205857  | 5.650046274  | -0.751416861 |
| H  | 8.857594239  | -1.787213305 | -3.350704816 |
| H  | -2.358998462 | 1.382752148  | -0.661784363 |
| H  | -0.401902003 | 3.304325139  | 0.548194842  |
| H  | 0.445157031  | 5.433341073  | 0.147569336  |
| H  | 5.540652715  | 1.411277194  | -4.207561264 |
| H  | -2.423526039 | 1.561360053  | 1.073902287  |
| C  | 2.567743223  | -4.656094118 | 0.405880945  |
| C  | 3.040062165  | -1.177321137 | -0.945237395 |
| C  | 4.216986636  | -1.250086121 | -1.686444987 |
| C  | 2.936108200  | 3.647180386  | -0.928884463 |
| C  | 2.418560811  | -2.388668499 | -0.353690341 |
| C  | 3.133183025  | -3.575239585 | -0.243751334 |
| C  | 2.355014551  | 2.403753432  | -0.702963614 |
| C  | 4.246544070  | 1.125130131  | -1.772975887 |
| C  | 4.823229492  | -0.085659239 | -2.126180618 |
| C  | 3.043002194  | 1.131812005  | -1.071534626 |

|   |             |              |              |
|---|-------------|--------------|--------------|
| C | 8.246453086 | -0.301480603 | -4.611443184 |
| C | 0.626210147 | -3.318410700 | 0.769432605  |
| C | 7.032055711 | -1.093378359 | -2.729431146 |
| C | 1.291113407 | -4.532757829 | 0.929913845  |
| C | 7.285109335 | 0.638644665  | -4.904445896 |
| C | 6.047540410 | -0.141015704 | -2.972633855 |
| C | 2.220461181 | 4.789553239  | -0.604167401 |
| C | 8.163833965 | -1.165110785 | -3.534148797 |
| C | 0.459135364 | 3.390877608  | 0.157266234  |
| C | 0.960832084 | 4.664163325  | -0.065676093 |
| C | 6.194781366 | 0.739367807  | -4.055956417 |
